# Supplementary material
Source: MDPI journal article supplement (https://www.mdpi.com/2227-7390/11/4/967)
Supplement: s1 [file s1]

### Supplementary files

**Table S1.** Dataset for RTC silicon photovoltaic cell and the results for the current using BWOA

| Measured RTC data |                    | SDM-BWOA             | DDM-BWOA             | Error Values                       |                                     |
|-------------------|--------------------|----------------------|----------------------|------------------------------------|-------------------------------------|
| V [V]             | I <sub>m</sub> [A] | I <sub>c</sub> [A]   | I <sub>c</sub> [A]   | SDM                                | DDM                                 |
| -0.2057           | 0.7640             | 0.764087703686289    | 0.763907924900087    | $8.77036862894087 \times 10^{-05}$ | $-9.20750999126030 \times 10^{-05}$ |
| -0.1291           | 0.7620             | 0.762663086107012    | 0.762564305032765    | 0.000663086107012378               | 0.000564305032765167                |
| -0.0588           | 0.7605             | 0.761355307147406    | 0.761330102118770    | 0.000855307147405671               | 0.000830102118770326                |
| 0.0057            | 0.7605             | 0.760153991056235    | 0.760194458176645    | -0.000346008943765352              | -0.000305541823354627               |
| 0.0646            | 0.7600             | 0.759055208976456    | 0.759151568371366    | -0.000944791023543612              | -0.000848431628633795               |
| 0.1185            | 0.7590             | 0.758042345371249    | 0.758181926912848    | -0.000957654628750637              | -0.000818073087151872               |
| 0.1678            | 0.7570             | 0.757091654151800    | 0.757256968621908    | $9.1654151799680 \times 10^{-05}$  | 0.000256968621908271                |
| 0.2132            | 0.7570             | 0.756141365039090    | 0.756308725705275    | -0.000858634960909654              | -0.000691274294724709               |
| 0.2545            | 0.7555             | 0.755086873020116    | 0.755226721783036    | -0.000413126979883716              | -0.000273278216963768               |
| 0.2924            | 0.7540             | 0.753663878570242    | 0.753744255511693    | -0.000336121429758363              | -0.000255744488307008               |
| 0.3269            | 0.7505             | 0.751390966888911    | 0.751386067340965    | 0.000890966888911104               | 0.000886067340965191                |
| 0.3585            | 0.7465             | 0.747353851785036    | 0.747253362143312    | 0.000853851785036386               | 0.000753362143311676                |
| 0.3873            | 0.7385             | 0.740117222292567    | 0.739937812642467    | 0.00161722229256678                | 0.00143781264246667                 |
| 0.4137            | 0.7280             | 0.727382225264810    | 0.727168406572573    | -0.000617774735189869              | -0.000831593427427446               |
| 0.4373            | 0.7065             | 0.706972651493744    | 0.706788976476825    | 0.000472651493744425               | 0.000288976476824465                |
| 0.4590            | 0.6755             | 0.675280151427688    | 0.675184281664695    | -0.000219848572312054              | -0.000315718335304749               |
| 0.4784            | 0.6320             | 0.630758272226471    | 0.630773702827327    | -0.00124172777352871               | -0.00122629717267342                |
| 0.4960            | 0.5730             | 0.571928358068966    | 0.572037012402298    | -0.00107164193103415               | -0.000962987597701526               |
| 0.5119            | 0.4990             | 0.499607018422965    | 0.499758563117576    | 0.000607018422965122               | 0.000758563117576383                |
| 0.5265            | 0.4130             | 0.413648791997119    | 0.413773362738465    | 0.000648791997119480               | 0.000773362738465344                |
| 0.5398            | 0.3165             | 0.317510109469288    | 0.317558299785278    | 0.00101010946928809                | 0.00105829978527772                 |
| 0.5521            | 0.2120             | 0.212154939098163    | 0.212102027430469    | 0.000154939098162527               | 0.000102027430468693                |
| 0.5633            | 0.1035             | 0.102251311825317    | 0.102118377066160    | -0.00124868817468334               | -0.00138162293383995                |
| 0.5736            | -0.0100            | -0.00871754163612570 | -0.00882931903970998 | 0.00128245836387430                | 0.00117068096029002                 |
| 0.5833            | -0.1230            | -0.125507412722793   | -0.125555848939070   | -0.00250741272279320               | -0.00255584893907049                |
| 0.5900            | -0.2100            | -0.208472326530722   | -0.208322720916255   | 0.00152767346927754                | 0.00167727908374460                 |

**Table S2.** Dataset for aSi silicon photovoltaic cell and the results for the current using BWOA

| Measured aSi:H data |                    | SDM -BWOA          | DDM -BWOA          | Error Values                        |                                     |
|---------------------|--------------------|--------------------|--------------------|-------------------------------------|-------------------------------------|
| V [V]               | I <sub>c</sub> [A] | I <sub>c</sub> [A] | I <sub>c</sub> [A] | SDM                                 | DDM                                 |
| -0.01               | 0.0112831          | 0.0113639170777395 | 0.0113543640131099 | $8.08170777394854 \times 10^{-05}$  | $7.12640131098792 \times 10^{-05}$  |
| 0.00848             | 0.0112656          | 0.0113284369737074 | 0.0113204995286285 | $6.28369737073666 \times 10^{-05}$  | $5.48995286285305 \times 10^{-05}$  |
| 0.026955            | 0.0112425          | 0.0112929293836994 | 0.0112865571019497 | $5.04293836994085 \times 10^{-05}$  | $4.40571019497057 \times 10^{-05}$  |
| 0.045435            | 0.0112236          | 0.0112573662588710 | 0.0112524961088132 | $3.37662588709813 \times 10^{-05}$  | $2.88961088131829 \times 10^{-05}$  |
| 0.063915            | 0.0112024          | 0.0112217462698878 | 0.0112183121237316 | $1.93462698878343 \times 10^{-05}$  | $1.59121237316134 \times 10^{-05}$  |
| 0.08239             | 0.0111931          | 0.0111860655479016 | 0.0111839830059655 | $-7.03445209844673 \times 10^{-06}$ | $-9.11699403445543 \times 10^{-06}$ |
| 0.10087             | 0.0111547          | 0.0111502880256704 | 0.0111494938943344 | $-4.41197432959548 \times 10^{-06}$ | $-5.20610566559498 \times 10^{-06}$ |
| 0.11935             | 0.0111104          | 0.0111144026028242 | 0.0111148078141574 | $4.00260282415986 \times 10^{-06}$  | $4.40781415743906 \times 10^{-06}$  |
| 0.137825            | 0.011099           | 0.0110783933602251 | 0.0110798707977408 | $-2.06066397749165 \times 10^{-05}$ | $-1.91292022591587 \times 10^{-05}$ |
| 0.156305            | 0.0110782          | 0.0110422090155986 | 0.0110446518418724 | $-3.59909844013552 \times 10^{-05}$ | $-3.35481581276303 \times 10^{-05}$ |
| 0.174785            | 0.0110397          | 0.0110058199278824 | 0.0110091162075602 | $-3.38800721176400 \times 10^{-05}$ | $-3.05837924397638 \times 10^{-05}$ |
| 0.19326             | 0.011007           | 0.0109691873123277 | 0.0109731964262600 | $-3.78126876722854 \times 10^{-05}$ | $-3.38035737400318 \times 10^{-05}$ |
| 0.21175             | 0.0109816          | 0.0109322109202030 | 0.0109367798898797 | $-4.93890797969958 \times 10^{-05}$ | $-4.48201101203357 \times 10^{-05}$ |
| 0.2302              | 0.0109413          | 0.0108949268742292 | 0.0108999064716921 | $-4.63731257707746 \times 10^{-05}$ | $-4.13935283078634 \times 10^{-05}$ |
| 0.2487              | 0.0108962          | 0.0108570604318233 | 0.0108622844260555 | $-3.91395681766521 \times 10^{-05}$ | $-3.39155739444586 \times 10^{-05}$ |
| 0.26715             | 0.010861           | 0.0108187020930534 | 0.0108239809683603 | $-4.22979069466256 \times 10^{-05}$ | $-3.70190316396641 \times 10^{-05}$ |
| 0.28565             | 0.0108375          | 0.0107795020856175 | 0.0107846349086185 | $-5.79979143824922 \times 10^{-05}$ | $-5.28650913814814 \times 10^{-05}$ |
| 0.30415             | 0.0107773          | 0.0107393874707428 | 0.0107442051723617 | $-3.79125292571617 \times 10^{-05}$ | $-3.30948276383095 \times 10^{-05}$ |
| 0.3226              | 0.0107235          | 0.0106982535022866 | 0.0107025490038831 | $-2.52464977133684 \times 10^{-05}$ | $-2.09509961168735 \times 10^{-05}$ |
| 0.3411              | 0.0106896          | 0.0106556079884685 | 0.0106591567134376 | $-3.39920115315483 \times 10^{-05}$ | $-3.04432865623570 \times 10^{-05}$ |
| 0.35955             | 0.0106237          | 0.0106113493316985 | 0.0106139807656461 | $-1.23506683014744 \times 10^{-05}$ | $-9.71923435390439 \times 10^{-06}$ |
| 0.37805             | 0.0105959          | 0.0105648250102782 | 0.0105663058693081 | $-3.10749897217792 \times 10^{-05}$ | $-2.95941306919460 \times 10^{-05}$ |
| 0.3965              | 0.0105226          | 0.0105157775156068 | 0.0105159789629445 | $-6.82248439320445 \times 10^{-06}$ | $-6.62103705550976 \times 10^{-06}$ |
| 0.415               | 0.0104671          | 0.0104633086074013 | 0.0104620550683966 | $-3.79139259873949 \times 10^{-06}$ | $-5.04493160344809 \times 10^{-06}$ |
| 0.4335              | 0.0104073          | 0.0104067626851978 | 0.0104039388046724 | $-5.37314802170549 \times 10^{-07}$ | $-3.36119532757563 \times 10^{-06}$ |
| 0.45195             | 0.0103272          | 0.0103453423619186 | 0.0103409050703820 | $1.81423619185616 \times 10^{-05}$  | $1.37050703819894 \times 10^{-05}$  |
| 0.47045             | 0.0102575          | 0.0102775145388884 | 0.0102714300671013 | $2.00145388884049 \times 10^{-05}$  | $1.39300671012591 \times 10^{-05}$  |

|         |                        |                                |                                |                                     |                                     |
|---------|------------------------|--------------------------------|--------------------------------|-------------------------------------|-------------------------------------|
| 0.4889  | 0.0101725              | 0.0102021654004108             | 0.0101945166243710             | $2.96654004107912 \times 10^{-05}$  | $2.20166243710164 \times 10^{-05}$  |
| 0.5074  | 0.0100598              | 0.0101170471506706             | 0.0101080209275142             | $5.72471506706269 \times 10^{-05}$  | $4.82209275141695 \times 10^{-05}$  |
| 0.52585 | 0.009967               | 0.0100203509748415             | 0.0100101521469287             | $5.33509748415033 \times 10^{-05}$  | $4.31521469286857 \times 10^{-05}$  |
| 0.54435 | 0.0098534              | 0.0099087337458596             | 0.009897740471745              | $5.53337458596669 \times 10^{-05}$  | $4.43404717449976 \times 10^{-05}$  |
| 0.56285 | 0.0097021              | 0.0097789425523616             | 0.0097677017183262             | $7.68425523616154 \times 10^{-05}$  | $6.56017183262737 \times 10^{-05}$  |
| 0.5813  | 0.0095669              | 0.0096270924456899             | 0.0096161014615041             | $6.01924456899491 \times 10^{-05}$  | $4.92014615041288 \times 10^{-05}$  |
| 0.5998  | 0.0093838              | 0.0094470103124487             | 0.0094370410925342             | $6.32103124487120 \times 10^{-05}$  | $5.32410925342119 \times 10^{-05}$  |
| 0.61825 | 0.0092011              | 0.0092330702072393             | 0.0092247433380352             | $3.19702072393430 \times 10^{-05}$  | $2.36433380352667 \times 10^{-05}$  |
| 0.63675 | 0.0089748              | 0.0089759131359037             | 0.0089699816562542             | $1.11313590373148 \times 10^{-06}$  | $-4.81834374573865 \times 10^{-06}$ |
| 0.6552  | 0.0086853              | 0.0086668150794210             | 0.0086640124268935             | $-1.84849205789872 \times 10^{-05}$ | $-2.12875731064877 \times 10^{-05}$ |
| 0.6737  | 0.0083376              | 0.0082915344233485             | 0.0082922931452415             | $-4.60655766514728 \times 10^{-05}$ | $-4.53068547584257 \times 10^{-05}$ |
| 0.69215 | 0.007911               | 0.0078365990999339             | 0.0078410068157045             | $-7.44009000660465 \times 10^{-05}$ | $-6.99931842954252 \times 10^{-05}$ |
| 0.71065 | 0.0073725              | 0.0072802844837173             | 0.0072880300536298             | $-9.22155162826855 \times 10^{-05}$ | $-8.44699463701066 \times 10^{-05}$ |
| 0.72915 | 0.006665               | 0.0065998101880698             | 0.0066104339613021             | $-6.51898119301492 \times 10^{-05}$ | $-5.45660386978234 \times 10^{-05}$ |
| 0.7476  | 0.005787               | 0.0057680779161056             | 0.0057802035770437             | $-1.89220838943578 \times 10^{-05}$ | $-6.79642295621421 \times 10^{-06}$ |
| 0.7661  | 0.0047014              | 0.0047440293303676             | 0.0047556279359075             | $4.26293303676904 \times 10^{-05}$  | $5.42279359075160 \times 10^{-05}$  |
| 0.78455 | 0.0034034              | 0.0034881147448844             | 0.0034959598435628             | $8.47147448844584 \times 10^{-05}$  | $9.25598435628531 \times 10^{-05}$  |
| 0.80305 | 0.0018769              | 0.0019375107343568             | 0.0019368173051715             | $6.06107343568895 \times 10^{-05}$  | $5.99173051715352 \times 10^{-05}$  |
| 0.8215  | $9.58 \times 10^{-05}$ | $3.1502399936 \times 10^{-05}$ | $1.6859656728 \times 10^{-05}$ | $-6.42950000631984 \times 10^{-05}$ | $-7.89377432711714 \times 10^{-05}$ |

**Table S3.** Dataset for PWP201 photovoltaic panel and the results for the current using BWOA

| Measured PWP201 data |                    | SDM-BWOA           | DDM-BWOA           | Error Values          |                       |
|----------------------|--------------------|--------------------|--------------------|-----------------------|-----------------------|
| V [V]                | I <sub>c</sub> [A] | I <sub>c</sub> [A] | I <sub>c</sub> [A] | SDM                   | DDM                   |
| 0.1248               | 1.0315             | 1.02911916122193   | 1.02908463756044   | -0.00238083877807149  | -0.00241536243955531  |
| 1.8093               | 1.0300             | 1.02738107306964   | 1.02736058353566   | -0.00261892693036425  | -0.00263941646434329  |
| 3.3511               | 1.0260             | 1.02574179684753   | 1.02573388667919   | -0.000258203152474268 | -0.000266113320808836 |
| 4.7622               | 1.0220             | 1.02410715472446   | 1.02411026126003   | 0.00210715472445577   | 0.00211026126003477   |
| 6.0538               | 1.0180             | 1.02229180451599   | 1.02230407685751   | 0.00429180451599209   | 0.00430407685750933   |
| 7.2364               | 1.0155             | 1.01993068084600   | 1.01994982441441   | 0.00443068084599552   | 0.00444982441440955   |
| 8.3189               | 1.0140             | 1.01636310566225   | 1.01638623772660   | 0.00236310566224973   | 0.00238623772659796   |

|         |         |                      |                      |                                    |                                   |
|---------|---------|----------------------|----------------------|------------------------------------|-----------------------------------|
| 9.3097  | 1.0100  | 1.01049615133223     | 1.01051982999519     | 0.000496151332229911               | 0.000519829995186516              |
| 10.2163 | 1.0035  | 1.00062896976236     | 1.00064952115116     | -0.00287103023764201               | -0.00285047884884193              |
| 11.0449 | 0.9880  | 0.984548378560180    | 0.984562532134642    | -0.00345162143982014               | -0.00343746786535804              |
| 11.8018 | 0.9630  | 0.959521676190664    | 0.959527403822914    | -0.00347832380933644               | -0.00347259617708584              |
| 12.4929 | 0.9255  | 0.922838818136119    | 0.922836058146630    | -0.00266118186388109               | -0.00266394185337049              |
| 13.1231 | 0.8725  | 0.872599662897686    | 0.872590496291441    | $9.96628976861480 \times 10^{-05}$ | $9.0496291441311 \times 10^{-05}$ |
| 13.6983 | 0.8075  | 0.807274263734078    | 0.807262628613154    | -0.000225736265921594              | -0.000237371386845986             |
| 14.2221 | 0.7265  | 0.728336478022576    | 0.728326630653704    | 0.00183647802257558                | 0.00182663065370348               |
| 14.6995 | 0.6345  | 0.637138000002873    | 0.637133767661910    | 0.00263800000287295                | 0.00263376766191048               |
| 15.1346 | 0.5345  | 0.536213063092143    | 0.536216923910961    | 0.00171306309214347                | 0.00171692391096068               |
| 15.5311 | 0.4275  | 0.429511324816342    | 0.429523400871342    | 0.00201132481634203                | 0.00202340087134156               |
| 15.8929 | 0.3185  | 0.318774482672914    | 0.318793802338219    | 0.000274482672914300               | 0.000293802338218963              |
| 16.2229 | 0.2085  | 0.207389506586033    | 0.207413273234648    | -0.00111049341396682               | -0.00108672676535179              |
| 16.5241 | 0.1010  | 0.0961671717438964   | 0.0961924877533427   | -0.00483282825610357               | -0.00480751224665735              |
| 16.7987 | -0.0080 | -0.00832538604429356 | -0.00830486620292781 | -0.000325386044293559              | -0.000304866202927807             |
| 17.0499 | -0.1110 | -0.110936482485436   | -0.110923557950866   | $6.3517514563807 \times 10^{-05}$  | $7.6442049134387 \times 10^{-05}$ |
| 17.2793 | -0.2090 | -0.209247265477190   | -0.209245406427170   | -0.000247265477189534              | -0.000245406427169720             |
| 17.4885 | -0.3030 | -0.300863586255949   | -0.300876884740028   | 0.00213641374405144                | 0.00212311525997161               |

**Table S4.** Dataset for PVM 752 GaAs photovoltaic panel and the results for the current using BWOA.

| Measured PVM data |                    | SDM-BWOA           | DDM-BWOA           | Error Values                        |                                     |
|-------------------|--------------------|--------------------|--------------------|-------------------------------------|-------------------------------------|
| V [V]             | I <sub>c</sub> [A] | I <sub>c</sub> [A] | I <sub>c</sub> [A] | SDM                                 | DDM                                 |
| -0.1659           | 0.1001             | 0.100230939995650  | 0.100115085813528  | 0.000130939995650434                | $1.50858135282428 \times 10^{-05}$  |
| -0.1281           | 0.1                | 0.100168878592889  | 0.100075376218311  | 0.000168878592889138                | $7.53762183107604 \times 10^{-05}$  |
| -0.0888           | 0.0999             | 0.100104350124348  | 0.100033767288574  | 0.000204350124347760                | 0.000133767288573713                |
| -0.049            | 0.0999             | 0.100038890664094  | 0.0999911440462642 | 0.000138890664094171                | $9.11440462641605 \times 10^{-05}$  |
| -0.0102           | 0.0999             | 0.0999750759085191 | 0.0999490966639285 | $7.50759085191149 \times 10^{-05}$  | $4.90966639285356 \times 10^{-05}$  |
| 0.0275            | 0.0998             | 0.0999131789558785 | 0.0999077382492599 | 0.000113178955878451                | 0.000107738249259901                |
| 0.0695            | 0.0999             | 0.0998439924397019 | 0.0998606743345032 | $-5.60075602981242 \times 10^{-05}$ | $-3.93256654968033 \times 10^{-05}$ |

|        |        |                    |                    |                                     |                                     |
|--------|--------|--------------------|--------------------|-------------------------------------|-------------------------------------|
| 0.1061 | 0.0998 | 0.0997839045499621 | 0.0998189232636929 | $-1.60954500378896 \times 10^{-05}$ | $1.89232636928771 \times 10^{-05}$  |
| 0.146  | 0.0998 | 0.0997182802374666 | 0.0997721675924786 | $-8.17197625333638 \times 10^{-05}$ | $-2.78324075214526 \times 10^{-05}$ |
| 0.1828 | 0.0997 | 0.0996578626587503 | 0.0997278136205772 | $-4.21373412497067 \times 10^{-05}$ | $2.78136205772023 \times 10^{-05}$  |
| 0.223  | 0.0997 | 0.0995917428519070 | 0.0996774952220992 | -0.000108257148092997               | $-2.25047779008336 \times 10^{-05}$ |
| 0.26   | 0.0996 | 0.0995309915146817 | 0.0996292536649850 | $-6.90084853182532 \times 10^{-05}$ | $2.92536649850461 \times 10^{-05}$  |
| 0.3001 | 0.0997 | 0.0994649142186488 | 0.0995740792852066 | -0.000235085781351188               | -0.000125920714793448               |
| 0.3406 | 0.0996 | 0.0993983701074584 | 0.0995150063598814 | -0.000201629892541605               | $-8.49936401186024 \times 10^{-05}$ |
| 0.3789 | 0.0995 | 0.0993353843506576 | 0.0994550841484594 | -0.000164615649342420               | $-4.49158515405806 \times 10^{-05}$ |
| 0.4168 | 0.0994 | 0.0992729063417915 | 0.0993909371814196 | -0.000127093658208483               | $-9.06281858037428 \times 10^{-06}$ |
| 0.4583 | 0.0994 | 0.0992039267542620 | 0.0993135385001014 | -0.000196073245738046               | $-8.64614998985908 \times 10^{-05}$ |
| 0.4949 | 0.0993 | 0.0991422222130243 | 0.0992375246404533 | -0.000157777786975677               | $-6.24753595467320 \times 10^{-05}$ |
| 0.537  | 0.0993 | 0.0990681258112317 | 0.0991373473776350 | -0.000231874188768341               | -0.000162652622365048               |
| 0.5753 | 0.0992 | 0.0989937261002853 | 0.0990290308827122 | -0.000206273899714726               | -0.000170969117287811               |
| 0.6123 | 0.099  | 0.0989057174373760 | 0.0988984113307809 | $-9.42825626240179 \times 10^{-05}$ | -0.000101588669219152               |
| 0.6546 | 0.0988 | 0.0987544392619073 | 0.0986875527844903 | $-4.55607380927259 \times 10^{-05}$ | -0.000112447215509751               |
| 0.6918 | 0.0983 | 0.0985100515774959 | 0.0983862164552676 | 0.000210051577495915                | $8.62164552675598 \times 10^{-05}$  |
| 0.7318 | 0.0977 | 0.0979466132350273 | 0.0977689978128640 | 0.000246613235027338                | $6.89978128639995 \times 10^{-05}$  |
| 0.7702 | 0.0963 | 0.0966964456684183 | 0.0964972186092311 | 0.000396445668418260                | 0.000197218609231123                |
| 0.8053 | 0.0937 | 0.0941729855342935 | 0.0940029070744328 | 0.000472985534293535                | 0.000302907074432757                |
| 0.8329 | 0.09   | 0.0904096451643265 | 0.0903003656801820 | 0.000409645164326497                | 0.000300365680182005                |
| 0.855  | 0.0855 | 0.0855846639580423 | 0.0855370975142949 | $8.46639580423247 \times 10^{-05}$  | $3.70975142949120 \times 10^{-05}$  |
| 0.8738 | 0.0799 | 0.0798632627244195 | 0.0798632368657914 | $-3.67372755804840 \times 10^{-05}$ | $-3.67631342086117 \times 10^{-05}$ |
| 0.8887 | 0.0743 | 0.0740588181765370 | 0.0740835020648640 | -0.000241181823462971               | -0.000216497935136034               |
| 0.9016 | 0.0683 | 0.0681668907920787 | 0.0682020829129945 | -0.000133109207921325               | $-9.79170870054752 \times 10^{-05}$ |
| 0.9141 | 0.0618 | 0.0615205424051200 | 0.0615514885254365 | -0.000279457594880052               | -0.000248511474563513               |
| 0.9248 | 0.0555 | 0.0552015704219524 | 0.0552210664031353 | -0.000298429578047640               | -0.000278933596864699               |
| 0.9344 | 0.0493 | 0.0490545458603126 | 0.0490597047354093 | -0.000245454139687379               | -0.000240295264590670               |
| 0.9445 | 0.0422 | 0.0421655298507326 | 0.0421559359737882 | $-3.44701492674474 \times 10^{-05}$ | $-4.40640262118139 \times 10^{-05}$ |
| 0.9533 | 0.0357 | 0.0357014483869612 | 0.0356771249685220 | $1.44838696119337 \times 10^{-06}$  | $-2.28750314780479 \times 10^{-05}$ |

|        |         |                      |                      |                                    |                                     |
|--------|---------|----------------------|----------------------|------------------------------------|-------------------------------------|
| 0.9618 | 0.0291  | 0.0291116957956494   | 0.0290755411376624   | $1.16957956494412 \times 10^{-05}$ | $-2.44588623375674 \times 10^{-05}$ |
| 0.9702 | 0.0222  | 0.0223802477200165   | 0.0223412825788558   | 0.000180247720016454               | 0.000141282578855814                |
| 0.9778 | 0.0157  | 0.0160675658009639   | 0.0160340059157772   | 0.000367565800963858               | 0.000334005915777223                |
| 0.9852 | 0.0092  | 0.00966098771501825  | 0.00963899593966827  | 0.000460987715018249               | 0.000438995939668271                |
| 0.9926 | 0.0026  | 0.00290915920131453  | 0.00290247016698557  | 0.000309159201314529               | 0.000302470166985569                |
| 0.9999 | -0.004  | -0.00410795100586316 | -0.00409542728608017 | -0.000107951005863156              | $-9.54272860801721 \times 10^{-05}$ |
| 1.0046 | -0.0085 | -0.00846840689550342 | -0.00842564258270891 | $3.15931044965814 \times 10^{-05}$ | $7.43574172910946 \times 10^{-05}$  |
| 1.0089 | -0.0124 | -0.0130041330093888  | -0.0129496713770302  | -0.000604133009388769              | -0.000549671377030181               |

**Table S5.** RMSE and computing time function of the number of the search agents and iterations using the BWOA.

a) RTC photovoltaic cell

| Model | Search Agents | Iterations | RMSE                    | Computing time [s] |
|-------|---------------|------------|-------------------------|--------------------|
| SDM   | 15            | 500        | 0.09716191950777        | 1.742201           |
|       | 25            |            | 0.01710505622307        | 1.872167           |
|       | 30            |            | 0.00164396452169        | 1.512047           |
|       | 50            |            | 0.00383259539179        | 1.515693           |
|       | 75            |            | 0.004933770771100       | 1.498199           |
|       | 100           |            | 0.001085117771710       | 1.647471           |
|       | 125           |            | 0.00114832069950        | 1.488976           |
|       | 150           |            | 0.008349955037951       | 1.453551           |
|       | 175           |            | 0.00114937303421        | 1.587463           |
|       | 200           |            | 0.000988469415022       | 1.517393           |
|       | 225           |            | 0.001451798170829       | 1.584988           |
|       | 250           |            | <b>0.00098756008969</b> | 1.635081           |
|       | 15            | 1500       | 0.09715942423576        | 1.605835           |
|       | 25            |            | 0.017105056155616       | 1.541983           |
|       | 30            |            | 0.001643964522          | 1.447000           |
|       | 50            |            | 0.003817897900727       | 1.775546           |
|       | 75            |            | 0.0043504430413010      | 1.833663           |
|       | 100           |            | 0.0009860218779         | 1.773923           |

|     |     |      |                           |          |
|-----|-----|------|---------------------------|----------|
|     | 125 |      | 0.0009860218778916        | 1.806350 |
|     | 150 |      | 0.008349951699929         | 1.794384 |
|     | 175 |      | <b>0.0009860218778915</b> | 2.889780 |
|     | 200 |      | 0.00098602187789          | 1.795901 |
|     | 225 |      | 0.0009860218778917        | 1.957148 |
|     | 250 |      | 0.000986021877892         | 1.965546 |
| DDM | 15  | 500  | 0.01050572689558          | 1.431802 |
|     | 25  |      | 0.13222009702754          | 1.425383 |
|     | 30  |      | 0.09139467303992          | 1.341051 |
|     | 50  |      | 0.00959812531089          | 1.424014 |
|     | 75  |      | 0.030305437424735         | 1.545112 |
|     | 100 |      | 0.001215287285674         | 1.480591 |
|     | 125 |      | <b>0.00110769738637</b>   | 1.582938 |
|     | 150 |      | 0.001513787604398         | 1.547388 |
|     | 175 |      | 0.00509963887265          | 1.652692 |
|     | 200 |      | 0.001260544656922         | 1.745343 |
|     | 225 |      | 0.001220487313764         | 1.837532 |
|     | 250 |      | 0.00115930926499          | 1.661523 |
|     | 15  | 1500 | 0.04833894044266          | 1.434656 |
|     | 25  |      | 0.132220096878317         | 1.460464 |
|     | 30  |      | 0.091394644822            | 1.541869 |
|     | 50  |      | 0.008521587026783         | 1.603826 |
|     | 75  |      | 0.0113808967215160        | 1.628334 |
|     | 100 |      | 0.0009849647498           | 1.693591 |
|     | 125 |      | 0.0009860318306789        | 1.783168 |
|     | 150 |      | 0.001293480722908         | 1.911392 |
|     | 175 |      | 0.0009773823187984        | 2.205030 |
|     | 200 |      | 0.00098287079716          | 1.997286 |
|     | 225 |      | 0.0009880226016394        | 2.082286 |

|  |     |  |                          |          |
|--|-----|--|--------------------------|----------|
|  | 250 |  | <b>0.000977382318798</b> | 2.166910 |
|--|-----|--|--------------------------|----------|

b) aSi photovoltaic cell

| Model | Search Agents | Iterations | RMSE                    | Computing time [s] |
|-------|---------------|------------|-------------------------|--------------------|
| SDM   | 15            | 500        | 0.00025850864029        | 1.819460           |
|       | 25            |            | 0.000182379079984       | 1.835827           |
|       | 30            |            | 0.00021557192555        | 1.408758           |
|       | 50            |            | 0.00023123583711        | 1.505987           |
|       | 75            |            | 0.000046385658906       | 1.503013           |
|       | 100           |            | 0.00026687570460        | 1.663363           |
|       | 125           |            | 0.00004630053566        | 1.488417           |
|       | 150           |            | 0.00011166644178        | 1.462640           |
|       | 175           |            | 0.00004613786472        | 1.543784           |
|       | 200           |            | <b>0.00004612322475</b> | 1.687007           |
|       | 225           |            | 0.00004613786473        | 1.557683           |
|       | 250           |            | 0.00004636648112        | 2.484998           |
|       | 15            | 1500       | 0.00025850864029        | 1.893793           |
|       | 25            |            | 0.000172193746961       | 1.502069           |
|       | 30            |            | 0.0002143436749         | 1.491199           |
|       | 50            |            | 0.00010014204529        | 1.621136           |
|       | 75            |            | 0.00004638329888        | 1.639022           |
|       | 100           |            | 0.0002380918118         | 1.718489           |
|       | 125           |            | 0.00004612466446        | 1.712930           |
|       | 150           |            | 0.0000461378647219      | 1.766652           |
|       | 175           |            | 0.00004613786472193     | 1.952037           |
|       | 200           |            | <b>0.00004612321932</b> | 1.959808           |
|       | 225           |            | 0.0000461378647219      | 2.392527           |
|       | 250           |            | 0.0000461378647         | 2.016107           |
| DDM   | 15            | 500        | 0.00074069315866        | 1.831961           |
|       | 25            |            | 0.000304097062639       | 1.358007           |



|  |     |      |                           |          |
|--|-----|------|---------------------------|----------|
|  | 30  |      | 0.00022479061417          | 1.555787 |
|  | 50  |      | 0.00008745923777          | 1.520240 |
|  | 75  |      | 0.000052354219962         | 1.649419 |
|  | 100 |      | 0.00006756649492          | 1.552289 |
|  | 125 |      | 0.00033719968990          | 1.564335 |
|  | 150 |      | 0.00004570188924          | 1.544579 |
|  | 175 |      | 0.00005720866346          | 1.998468 |
|  | 200 |      | 0.00004735659174          | 1.768161 |
|  | 225 |      | <b>0.00004346987976</b>   | 1.607626 |
|  | 250 |      | 0.00004815331029          | 1.841301 |
|  | 15  | 1500 | 0.00072898681904          | 1.462421 |
|  | 25  |      | 0.000304097062170         | 1.433821 |
|  | 30  |      | 0.0002243444565           | 1.499318 |
|  | 50  |      | 0.00008740888654          | 1.777893 |
|  | 75  |      | 0.00005235386756          | 1.667859 |
|  | 100 |      | 0.0000440434692           | 1.774815 |
|  | 125 |      | 0.00007745262769          | 1.881914 |
|  | 150 |      | 0.0000433353089633        | 1.914678 |
|  | 175 |      | 0.00004351547557564       | 2.050738 |
|  | 200 |      | 0.00004293936164          | 2.140468 |
|  | 225 |      | <b>0.0000409439377149</b> | 2.749709 |
|  | 250 |      | 0.0000425861269           | 2.338393 |

c) PWP201 photovoltaic panel

| Model | Search Agents | Iterations | RMSE              | Computing time [s] |
|-------|---------------|------------|-------------------|--------------------|
| SDM   | 15            | 500        | 0.01699313072150  | 1.340747           |
|       | 25            |            | 0.0053696967663   | 1.421998           |
|       | 30            |            | 0.0456048371678   | 1.862874           |
|       | 50            |            | 0.002632530780382 | 1.401712           |
|       | 75            |            | 0.0042192459144   | 1.410425           |

|     |     |      |                          |          |
|-----|-----|------|--------------------------|----------|
|     | 100 |      | 0.00406906000523         | 1.463479 |
|     | 125 |      | 0.00246561074616         | 1.664897 |
|     | 150 |      | 0.002490160954981        | 1.537866 |
|     | 175 |      | 0.00268791540250         | 1.651075 |
|     | 200 |      | 0.00242529963805         | 1.500461 |
|     | 225 |      | 0.00242507486821         | 1.730137 |
|     | 250 |      | <b>0.0024250748682</b>   | 1.616498 |
|     | 15  | 1500 | 0.016879683606338        | 1.406177 |
|     | 25  |      | 0.0053696920848          | 1.561392 |
|     | 30  |      | 0.043037538              | 1.467279 |
|     | 50  |      | 0.0024577586136          | 1.483281 |
|     | 75  |      | 0.002440632411948        | 1.556448 |
|     | 100 |      | 0.0024250748685          | 1.661467 |
|     | 125 |      | 0.0024250748681          | 1.700580 |
|     | 150 |      | 0.00242507486810         | 1.741827 |
|     | 175 |      | <b>0.002425074868095</b> | 2.300761 |
|     | 200 |      | 0.00242507486810         | 1.953224 |
|     | 225 |      | 0.0024250748681          | 1.958053 |
|     | 250 |      | 0.00242507486810         | 2.003670 |
| DDM | 15  | 500  | 0.07364868968259         | 1.401682 |
|     | 25  |      | 0.0294308632298          | 1.339136 |
|     | 30  |      | 0.0028658793845          | 1.436284 |
|     | 50  |      | 0.007829179028347        | 1.378182 |
|     | 75  |      | 0.0025623981284          | 1.445102 |
|     | 100 |      | 0.00387315866781         | 1.466780 |
|     | 125 |      | 0.00254171658648         | 1.483492 |
|     | 150 |      | 0.002809853049893        | 1.548378 |
|     | 175 |      | 0.00242698332942         | 1.683659 |
|     | 200 |      | 0.00254725138487         | 1.581480 |

|  |     |      |                        |          |
|--|-----|------|------------------------|----------|
|  | 225 |      | 0.00245104309887       | 1.845615 |
|  | 250 |      | <b>0.0024393543586</b> | 1.735792 |
|  | 15  | 1500 | 0.073648689682590      | 1.387619 |
|  | 25  |      | 0.0294308628930        | 1.609740 |
|  | 30  |      | 0.002865871            | 1.570120 |
|  | 50  |      | 0.0077987381348        | 1.586099 |
|  | 75  |      | 0.002562347940795      | 1.701031 |
|  | 100 |      | 0.0025454866892        | 1.693371 |
|  | 125 |      | <b>0.0024250748681</b> | 1.992434 |
|  | 150 |      | 0.00247654830089       | 1.858437 |
|  | 175 |      | 0.002425074993961      | 1.930152 |
|  | 200 |      | 0.00254721835439       | 2.046289 |
|  | 225 |      | 0.0024250748787        | 2.072408 |
|  | 250 |      | 0.00242600685477       | 2.163120 |

d) PVM 752 GaAs thin-film photovoltaic panel

| Model | Search Agents | Iterations | RMSE                    | Computing time [s] |
|-------|---------------|------------|-------------------------|--------------------|
| SDM   | 15            | 500        | 0.0005299395750         | 1.392556           |
|       | 25            |            | 0.011962711499594       | 1.348896           |
|       | 30            |            | 0.00023219793246        | 1.356738           |
|       | 50            |            | 0.0003986408971         | 1.410046           |
|       | 75            |            | 0.00074827652981        | 1.486375           |
|       | 100           |            | 0.00023215854451        | 1.457388           |
|       | 125           |            | 0.00044820133311        | 1.478273           |
|       | 150           |            | 0.00078312325797        | 1.653348           |
|       | 175           |            | <b>0.00023029317714</b> | 1.647252           |
|       | 200           |            | 0.00115031315804        | 1.635350           |
|       | 225           |            | 0.00044502635824        | 1.922878           |
|       | 250           |            | 0.0002440245217         | 1.644363           |

|     |     |      |                         |          |
|-----|-----|------|-------------------------|----------|
|     | 15  | 1500 | 0.000529934354780       | 1.438112 |
|     | 25  |      | 0.0118335482048         | 1.447748 |
|     | 30  |      | 0.000232197932458       | 1.670031 |
|     | 50  |      | 0.00039824604045        | 1.465178 |
|     | 75  |      | 0.00074593635085        | 1.568069 |
|     | 100 |      | 0.00022780382937        | 1.729144 |
|     | 125 |      | 0.000745936350852       | 1.699583 |
|     | 150 |      | 0.000253646300816       | 1.866094 |
|     | 175 |      | 0.0002284383372276      | 2.018141 |
|     | 200 |      | 0.00022902129613        | 1.906894 |
|     | 225 |      | 0.0002278040888803      | 1.985836 |
|     | 250 |      | <b>0.000227803829</b>   | 2.054059 |
| DDM | 15  | 500  | 0.0084209901683         | 1.597923 |
|     | 25  |      | 0.584247804122671       | 1.410347 |
|     | 30  |      | 0.32211186412250        | 1.423493 |
|     | 50  |      | 0.0005206635988         | 1.413818 |
|     | 75  |      | 0.00026274390940        | 1.500997 |
|     | 100 |      | <b>0.00017114543330</b> | 1.496219 |
|     | 125 |      | 0.00032861296562        | 1.532872 |
|     | 150 |      | 0.00018827406761        | 1.558172 |
|     | 175 |      | 0.00023627754003        | 1.595936 |
|     | 200 |      | 0.00024209072486        | 1.549792 |
|     | 225 |      | 0.00023366716673        | 1.624788 |
|     | 250 |      | 0.000227815294741870    | 1.735792 |
|     | 15  | 1500 | 0.007900424195347       | 1.476325 |
|     | 25  |      | 0.5842474806957         | 1.453151 |
|     | 30  |      | 0.322111719208788       | 1.492318 |
|     | 50  |      | 0.00026883031360        | 1.544111 |
|     | 75  |      | 0.00023643579371        | 1.659773 |

|  |     |  |                           |          |
|--|-----|--|---------------------------|----------|
|  | 100 |  | 0.00016861021820          | 1.745712 |
|  | 125 |  | 0.000232477046877         | 1.886568 |
|  | 150 |  | 0.000175947504432         | 1.967023 |
|  | 175 |  | 0.0017503422578100        | 2.073735 |
|  | 200 |  | 0.00022655351795          | 2.603572 |
|  | 225 |  | <b>0.0001677947841902</b> | 2.284357 |
|  | 250 |  | 0.000177819360            | 2.351128 |

Best results are highlighted in bold
